# Supplementary material
Source: PubMed Central journal article supplement (PMC3932933)
Supplement: 1312296111_pnas.201312296SI.pdf [file 1312296111_pnas.201312296SI.pdf]

# Supporting Information

Ivarsson et al. 10.1073/pnas.1312296111

## SI Methods

**Protein Purifications.** Overnight cultures of GST and GST-PDZ (protein-95/disks large/zonula occludens-1) fusion proteins were used to inoculate 50 mL autoinducing MagicMedia (Invitrogen) supplemented with 25  $\mu\text{g}/\text{mL}$  kanamycin and were grown for 24 h at 37 °C with shaking. The bacteria were pelleted (8,000 rpm, 10 min), stored overnight at 20 °C, and purified using glutathione affinity resin (GE Healthcare). The coding regions were as described in Tonikian et al. (1).

**Phage Selections.** In brief, proteins were coated in 96-well Maxisorp microtiter plates (NUNC) overnight (15  $\mu\text{g}/\text{mL}$  protein in 100  $\mu\text{L}$  PBS per well). For the first two rounds of selection, three wells were used for each library, whereas a single well was used for the following rounds. Parallel plates were coated with GST alone to remove nonspecific binders by preselection. The next day, wells were blocked with BSA for 2 h with blocking buffer (PBS, 0.2% BSA). Phage pools representing the naïve peptide library were diluted 10-fold in PBS, precipitated with polyethylene glycol–NaCl [4% PEG-800 (wt/vol) and 0.5 M NaCl] and resuspended to a final concentration of  $10^{12}$  cfu/mL in PBT. In the first selection round, 100  $\mu\text{L}$  of the phage pool representing the naïve peptide library was added to each well of the preselection plate, incubated for 1 h, transferred to the target plate, and incubated for an additional 2 h. The plate was washed four times with cold wash buffer (PBS, 0.5% Tween-20) and bound phage was eluted by direct infection into bacteria by the addition of 100  $\mu\text{L}$  of log-phase *Escherichia coli* SS230 ( $A_{600} = 0.8$ ) in 2YT to each well and incubation for 30 min at 37 °C with shaking. M13K07 helper phage (New England Biolabs) was added to a final concentration of  $10^{10}$  phage per milliliter to enable phage production, and the cultures were incubated for 45 min at 37 °C with shaking. The cultures were transferred to 20 mL of 2YT supplemented with kanamycin (25  $\mu\text{g}/\text{mL}$ ), carbenicillin (100  $\mu\text{g}/\text{mL}$ ), and isopropyl- $\beta$ -D-thiogalactopyranoside (IPTG; 0.4 mM), and shaken overnight at 37 °C. The bacteria was pelleted by centrifugation (10 min, 17,090  $\times g$ ), the supernatant transferred to a new tube, and phage particles were precipitated by addition of one-fifth volume of polyethylene glycol:NaCl, incubated at 4 °C for 5 min, and centrifuged at 28,880  $\times g$  for 20 min. The supernatant was removed and the phage pellet was resuspended in 2 mL of PBT and then used for the next round of selection. The selections were carried out for five rounds and the progress followed by analyzing aliquots of phage supernatants in a phage ELISA (2).

The phage pools of rounds three to five and the naïve phage libraries were barcoded for Illumina sequencing as outlined by McLaughlin and Sidhu (3). Briefly, undiluted amplified phage pools (5  $\mu\text{L}$ ) were used as templates for 24 cycles of 50  $\mu\text{L}$  PCR reactions using unique combinations of barcoded primers for each reaction (0.5  $\mu\text{M}$  each; for sequences of amplicon and barcodes see ref. 3) and using Phusion High Fidelity DNA polymerase (New England Biolabs) using maximum polymerase and primer concentrations. The PCR products were confirmed by gel electrophoresis (2% agarose gel) of 1  $\mu\text{L}$  of PCR products.

The amount of the DNA amplicons was normalized by PEG/NaCl precipitation in a 96-well plate using a limiting amount of Ampure XP magnetic beads (Beckman Coulter). The magnetic beads were diluted 16-fold in PEG/NaCl and 100  $\mu\text{L}$  of this solution was mixed by pipetting with 40  $\mu\text{L}$  PCR product, incubated at room temperature for 20 min and then on a magnetic plate for 5 min to collect the beads. The supernatant was re-

moved and the beads were washed twice with 70% EtOH, dried for 20 min at room temperature, and eluted by addition of 20  $\mu\text{L}$  TE buffer (10 mM Tris, pH 8.0, and 0.1 mM EDTA). The normalized PCR amplicons were pooled (15  $\mu\text{L}$  per reaction) and concentrated using two columns of a QIAquick PCR purification kit. The pooled amplicons were run on 2% agarose gel (80 V for 30 min), excised, and purified on a column of a QIAquick gel extraction kit using a modified protocol that uses extended incubation at room temperature instead of heating in Buffer QG (4). The bound DNA was eluted with 30  $\mu\text{L}$  TE buffer. The concentration of the DNA was estimated picogreen dye as previously described. The PCR amplicons (~3 mg) were sent to Cofactor Genomics (Saint Louis, MO) for deep sequencing (Illumina Miseq; paired end 150 base reads, 20% PhiX). The obtained sequencing reads were filtered by discarding reads with an average PHRED quality score <35 (99.95% sequencing accuracy) or having a minimal nucleotide position score lower than 26.

**Analysis of the Naïve Libraries.** The quality of the proteomic peptide-phage display (ProP-PD) libraries were assessed from the deep-sequencing data by estimating the percent of starting templates, point mutations, and frame-shift mutations. The frequency of point mutations was estimated by assigning for each mutated sequence the most similar peptide sequence in the library design (denoted as parental sequence) and counting the amount of mutations as differences between the parental and mutated sequences on the DNA level. Frame-shifts were detected by aligning the DNA sequence of each mutated sequence to all sequences in the library design on DNA level using the Smith Waterman implementation provided by JAligner (parameters: identity matrix, gap opening penalty  $-5$ , gap extension  $-1$ ).

**Processing of Data from the Selections.** The sequencing data contains selected wild-type parental peptides as well as mutant versions thereof (Fig. S6). To retrieve relevant peptides, we filtered the data for peptides occurring in the original library designs. To remove the noise we plotted histograms of the peptide frequencies (after matching to the actual library design) and manually assigned cut-off values after the prominent peak representing spurious binders after visual inspection. To focus on relevant peptides from the human ProP-PD, we subdivided the library entries into three groups based on the data available in April 2013 into a “high interest” set of true C termini comprising sequences that are in addition to either RefSeq from 2010 or Ensembl62 [also contained in one of either RefSeq or Uniprot in their 2013 versions (excluding sequences annotated as fragmentary)], a “proteolytic set” with an experimental support for a cleavage event listed in the TopFind database, and a “low interest” set with Ensembl62 entries not matching the two other sets. We filtered for peptides found in the high interest set (Table S1) and list identified targets from the low and medium interest sets in Table S3. To obtain viral targets of interest from the deep-sequencing data (Table S2) we assigned cut-off values to remove nonspecific peptides and filtered the data by removing three hits that did not originate from viruses targeting higher eukaryotes.

**Comparison with Conventional Phage Display.** Position weight matrices (PWMs) were generated using the MUSI software (5) with standard settings and without realignment of the C termini. For comparison between human targets predicted using conventional

phage display, a set of 7mer and of 10mer PWMs were calculated from the Tonikian et al. (1) data using MUSI. To compare the hydrophobicity of the retrieved ligands we calculated for the heptamer PWMs (from ProP-PD and randomized phage display, respectively), an accumulated hydrophobicity value as the sum of each amino acid hydrophobicity weight multiplied by each amino acid normalized frequency in the PWM matrix over each position (6) (Fig. S2). To compare if ProP-PD ligands would have been predicted by conventional methods, we used the 10mer PWMs based on Tonikian's data to scan a human library equivalent to the high interest set of our design using MOTIPs (7) and ranked the target peptides from 1 and up. Sequences with identical scores were ranked equally.

**Peptide Synthesis.** Peptides (Table 1) were synthesized using a MultiPep synthesizer (Intavis AG Bioanalytical Instruments) on Wang resins (*p*-benzyloxybenzyl alcohol resin; AnaSpec) using 9-Fluorenyl methoxycarbonyl chemistry, with longer incubation or multiple cycles to conjugate the first C-terminal amino acid in the presence of 4-Dimethylaminopyridine (Sigma Aldrich). *N*-hydroxysuccinimide fluorescein (Pierce) was used to tag the N termini of the peptides with a fluorescent label. A 6-aminohexanoic acid moiety (AnaSpec) was used as a linker to separate the peptide from the fluorescein label to mitigate potential steric hinderance of protein-peptide interactions.

**Fluorescence Polarization Assays.** Binding affinities of PDZ domains for fluorescein-labeled peptides were determined using a 2103 Multilabel Reader (PerkinElmer). Briefly, fluorescein-labeled peptides were diluted to a final concentration of 2–5 nM and incubated with increasing concentrations of hexaHis-tagged-PDZ domains (0–100  $\mu$ M; 12 datapoints), using duplicate protein titrations in 384-well Corning plates. After mixing on a shaking platform for 2 min at 500 rpm and centrifuging for 2 min at 1,000  $\times$  *g*, the fluorescence polarization signals from the wells were measured. The data were analyzed using the Graphpad Prism software and  $K_D$  values were determined by curve fitting the data to a single binding-site model.

**Cloning.** Full-length Scribble, mitogen-activated kinase 12 (MK12), guanylate cyclase soluble subunit  $\alpha$ -2 (GCAY2) constructs were generated by Gateway cloning (Invitrogen) from entry clones in pDONR223 and shuttled into pcDNA5 FRT/TO with either an N terminus GFP or 3xFlag tag. CTNBN1 was PCR-amplified and cloned into pCMV2B (Stratagene) that contains a Flag-tag sequence at the N terminus. PKP4 was PCR-amplified and cloned into the Creator vector 3xFlag N terminus expression vector using the Creator recombination system (8).

**Cell Line.** HEK293T cells were maintained in DMEM (ATCC) supplemented with 10% FBS and 1% pen/strep/glutamine, and the appropriate selection antibiotics when required.

**Coimmunoprecipitations.** HEK293T cells were cotransfected with GFP-Scribble and Flag-tagged constructs (described above). Cells were lysed 48 h after transfections with radioimmune precipitation assay buffer [50 mM Tris-HCl, pH 7.4, 1% Nonidet P-40, 150 mM NaCl, 1 mM EDTA, 10 mM  $\text{Na}_3\text{VO}_4$ , 10 mM sodium pyrophosphate, 25 mM NaF, 1 $\times$  protease inhibitor mixture (Sigma)] for 30 min at 4  $^\circ\text{C}$  and coimmunoprecipitated with a GFP specific antibody (Abcam), as described pre-

viously (9). The resulting immunocomplexes and whole-cell lysates were analyzed by Western blot using the antibodies indicated in Fig. 4B. Protein samples were separated on a NuPage Bis-Tris 10% SDS/PAGE gel (Invitrogen) and transferred to nitrocellulose or PVDF membranes. Transferred samples were immunoblotted with primary anti-Flag antibodies, followed by incubation with horseradish peroxidase-conjugated goat anti-rabbit secondary antibodies (Santa Cruz Biotechnology) and detected using enhanced chemiluminescence (GE Healthcare).

**Immunofluorescence.** HEK293T cells were cotransfected with GFP-Scribble and Flag-tagged target constructs. Forty-eight hours after transfection, cells were fixed with 100% methanol for 20 min. Anti-Flag antibodies (1:400 Sigma) were incubated at room temperature for 1 h. Z-stack images were captured at room temperature by the Leica DMI6000B confocal microscope with a Leica 20 $\times$ /0.40 NA objective lens and a Hamamatsu EM-CCD digital camera (C9100-13), and imported into Velocity software. The imaging medium was PBS.

**Supplemental Network Analysis.** We created a protein-protein interaction network of the four PDZ-containing proteins with their 78 putative binding using Cytoscape (10). The disk large homolog 1 (DLG1) part of the network contains previously known interactions with anion transporters, potassium channels, and G protein-coupled receptors. Consistent with the role of DLG1 in neuronal signaling, there are also known interactions with proteins involved in neuronal transmission, such as the motor protein KIF1 $\beta$  (11) and the microtubule-binding protein CRIPT (12). Among the new ligands we predict for DLG1, we highlight the Ras association domain-containing protein 6 (RASSF6), which interacts with the mammalian Ste20-like kinases (MST1/2), which are core kinases of the Hippo pathway (13). The suggested interaction between DLG1 and RASSF6 may add to the growing list of links between the cell polarity proteins and the Hippo signaling pathway (14). In addition, our predicted interactions between DLG1 and the E3 ubiquitin ligases DCNL1, RNF12, and MARCH3 may suggest unexplored connections between the ubiquitin system and the DLGs. Overall, the putative ligands appear relevant to the functions of DLG1.

Consistent with previous studies and roles in cell polarity and adhesion, the network of the LAP proteins Densin-180, Erbin, and Scribble contains interactions with the catenin family members PKP4,  $\delta$ -catenin, and ARVCF, proteins that are found at the adherens junctions where they are involved in cell polarity and motility, but are also found in the nucleus where they are involved in transcriptional regulation (15–17). We also confirmed the interaction between Scribble and ARGH7, which is involved in cell migration, attachment, and cell spreading (18), and suggest novel interactions with a set of organic anion transporters and potassium channels as well as some nuclear proteins involved in transcriptional regulation, such as ATD2B. Scribble is not known to localize to the nucleus but it cannot be excluded that the proteins interact under specific circumstances. For example, ATD2B has been detected in the cytoplasm in some cancer cells (19). Under normal conditions, however, it is possible that the ATD2B C terminus is recognized by other class I PDZ proteins, such as NHERF2, that shuttle between the cytoplasm and the nucleus (20).

1. Tonikian R, et al. (2008) A specificity map for the PDZ domain family. *PLoS Biol* 6(9): e239.
2. Rajan S, Sidhu SS (2012) Simplified synthetic antibody libraries. *Methods Enzymol* 502: 3–23.
3. McLaughlin ME, Sidhu SS (2013) Engineering and analysis of peptide-recognition domain specificities by phage display and deep sequencing. *Methods Enzymol* 523: 327–349.

4. Quail MA, et al. (2008) A large genome center's improvements to the Illumina sequencing system. *Nat Methods* 5(12):1005–1010.
5. Kim T, et al. (2012) MUSI: An integrated system for identifying multiple specificity from very large peptide or nucleic acid data sets. *Nucleic Acids Res* 40(6):e47.
6. Monera OD, Sereda TJ, Zhou NE, Kay CM, Hodges RS (1995) Relationship of sidechain hydrophobicity and alpha-helical propensity on the stability of the single-stranded amphipathic alpha-helix. *J Pept Sci* 1(5):319–329.

7. Lam HY, et al. (2010) MOTIPS: Automated motif analysis for predicting targets of modular protein domains. *BMC Bioinformatics* 11:243.
8. Colwill K, et al. (2006) Modification of the Creator recombination system for proteomics applications—Improved expression by addition of splice sites. *BMC Biotechnol* 6:13.
9. Mak AB, et al. (2010) A lentiviral functional proteomics approach identifies chromatin remodeling complexes important for the induction of pluripotency. *Mol Cell Proteomics* 9(5):811–823.
10. Cline MS, et al. (2007) Integration of biological networks and gene expression data using Cytoscape. *Nat Protoc* 2(10):2366–2382.
11. Mok H, et al. (2002) Association of the kinesin superfamily motor protein KIF1B $\alpha$  with postsynaptic density-95 (PSD-95), synapse-associated protein-97, and synaptic scaffolding molecule PSD-95/discs large/zona occludens-1 proteins. *J Neurosci* 22(13):5253–5258.
12. Cai C, Coleman SK, Niemi K, Keinänen K (2002) Selective binding of synapse-associated protein 97 to GluR-A  $\alpha$ -amino-5-hydroxy-3-methyl-4-isoxazole propionate receptor subunit is determined by a novel sequence motif. *J Biol Chem* 277(35):31484–31490.
13. Ikeda M, et al. (2009) Hippo pathway-dependent and -independent roles of RASSF6. *Sci Signal* 2(90):ra59.
14. Boggiano JC, Fehon RG (2012) Growth control by committee: Intercellular junctions, cell polarity, and the cytoskeleton regulate Hippo signaling. *Dev Cell* 22(4):695–702.
15. Laura RP, et al. (2002) The Erbin PDZ domain binds with high affinity and specificity to the carboxyl termini of delta-catenin and ARVCF. *J Biol Chem* 277(15):12906–12914.
16. Izawa I, et al. (2002) ERBIN associates with p0071, an armadillo protein, at cell-cell junctions of epithelial cells. *Genes Cells* 7(5):475–485.
17. Zhang Y, et al. (2006) Convergent and divergent ligand specificity among PDZ domains of the LAP and zonula occludens (ZO) families. *J Biol Chem* 281(31):22299–22311.
18. Audebert S, et al. (2004) Mammalian Scribble forms a tight complex with the betaPIX exchange factor. *Curr Biol* 14(11):987–995.
19. Leachman NT, Brellier F, Ferralli J, Chiquet-Ehrismann R, Tucker RP (2010) ATAD2B is a phylogenetically conserved nuclear protein expressed during neuronal differentiation and tumorigenesis. *Dev Growth Differ* 52(9):747–755.
20. Thevenet L, et al. (2005) NHERF2/SIP-1 interacts with mouse SRY via a different mechanism than human SRY. *J Biol Chem* 280(46):38625–38630.

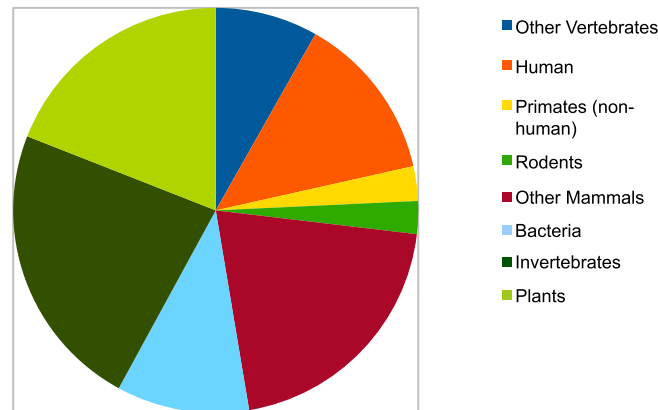

Fig. S1. Overview of the viral library design based on host organism.

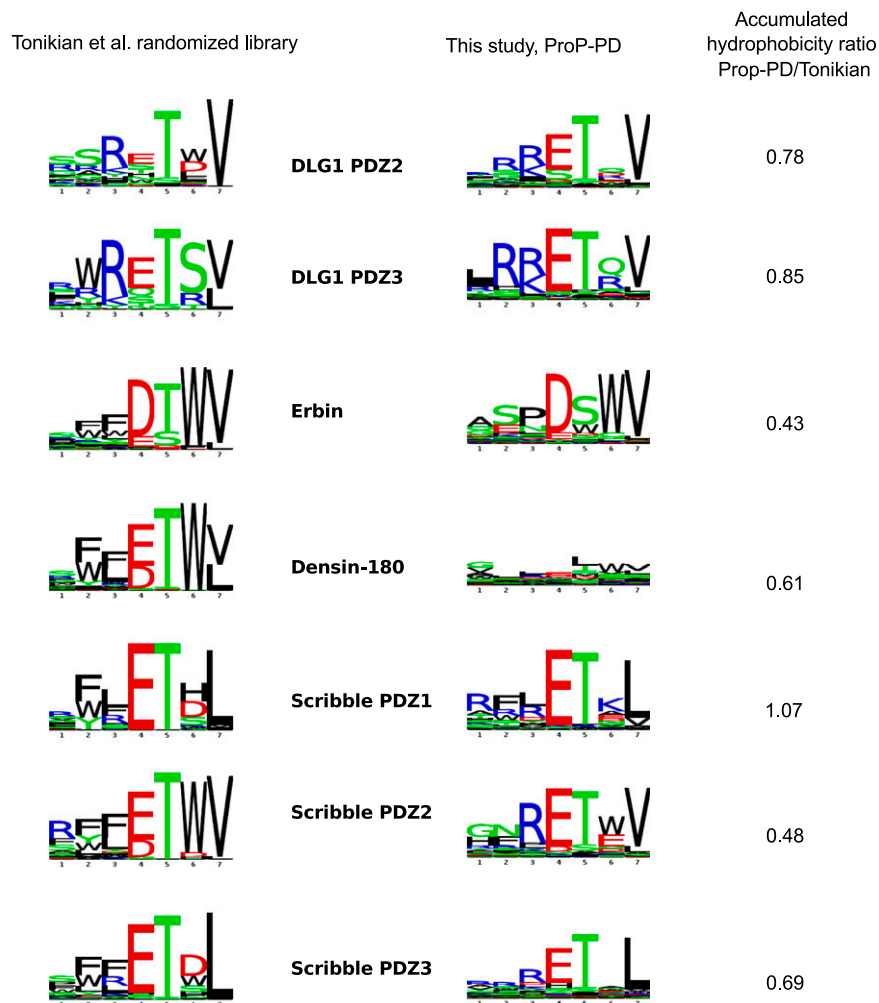

**Fig. S2.** Comparison between logos derived from ProP-PD and conventional peptide-phage display. On the left logos as derived from the Tonikian et al. (1) study using a combinatorial peptide-phage library, on the right logos derived from ProP-PD experiments. “Accumulated hydrophobicity ratio ProP-PD/Tonikian” gives the ratio of the accumulated and normalized hydrophobicity (see *Methods*). Values smaller than one indicate a more hydrophobic PWM for the data obtained from the conventional phage library.

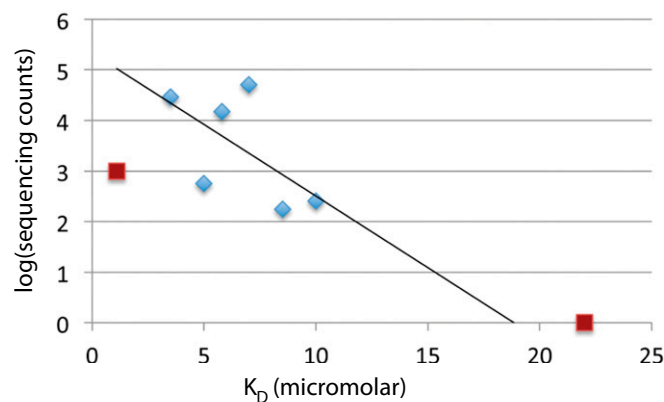

**Fig. S3.** Correlation between affinities and sequencing counts for Scribble PDZ3. Semilog scale plot of the sequencing counts versus affinities with a linear fit. The two red squares indicate outliers (the DNM1L peptide, to the left) and the GSPDSWV peptide (to the right).

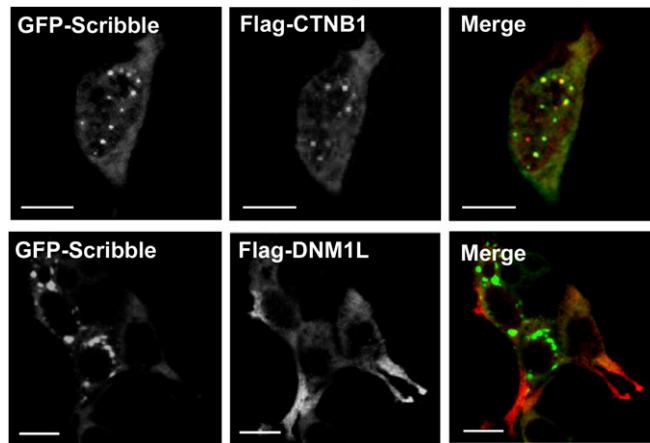

**Fig. 54.** Colocalization of Scribble with CTNB1 and DNM1L, respectively. (A) Colocalization of GFP-tagged full-length Scribble with Flag-tagged CTNB1 and DNM1L 48 h after cotransfection in HEK293T cells (confocal micrographs). (Scale bars, 15  $\mu$ m.)

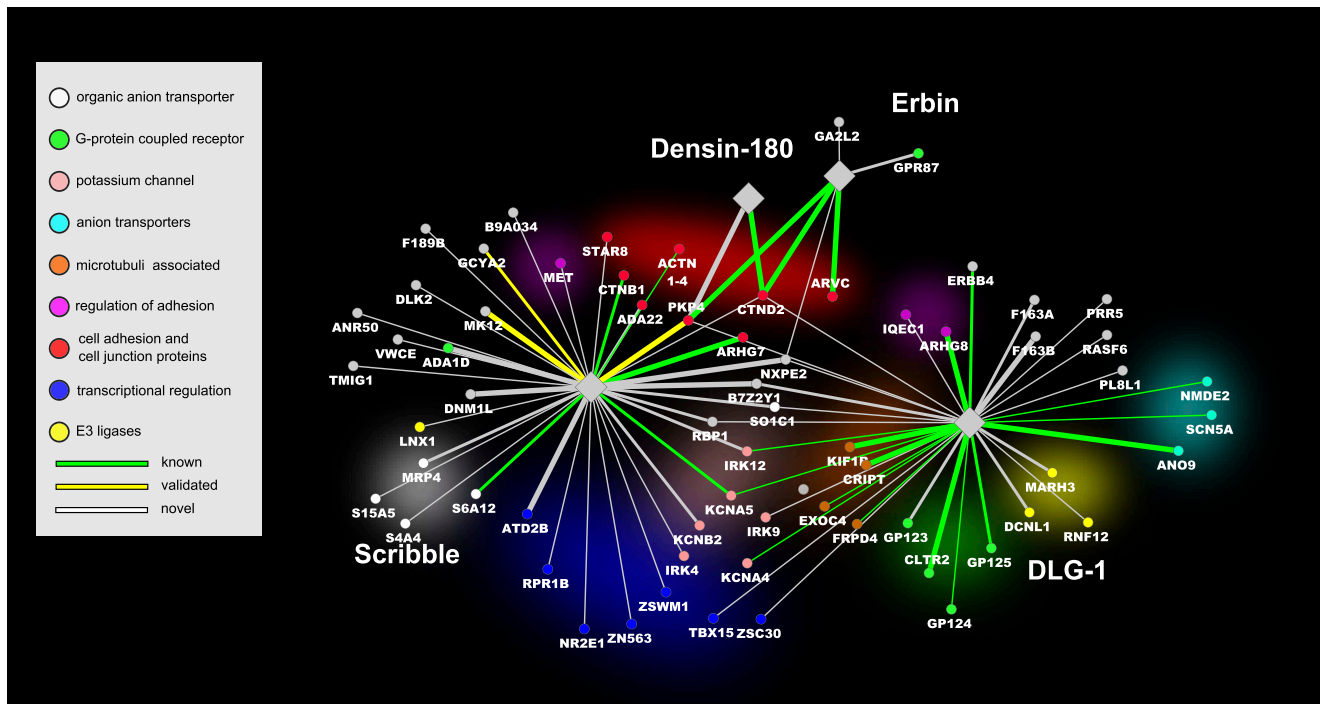

**Fig. 55.** Comprehensive network of identified interactions. The bait proteins (Densin-180 PDZ; Erbin PDZ; Scribble PDZ1, PDZ2, and PDZ3; and DLG1 PDZ1, PDZ2, and PDZ3) are indicated by gray diamonds. Ligands identified by ProP-PD experiments are indicated by circles, in which colors indicate their biological processes. The width of the connecting lines reflect the frequency of a ligand in the sequencing data, with the ligands divided into three categories: high [ $\log_{10}(\text{counts}) > 3$ ], medium [ $3 > \log_{10}(\text{counts}) > 2$ ], and low [ $\log_{10}(\text{counts}) < 2$ ]. The color of the connecting branches indicates if the interactions are novel (gray), known (green), or here validated (yellow). The network was designed using the program Cytoscape (10).



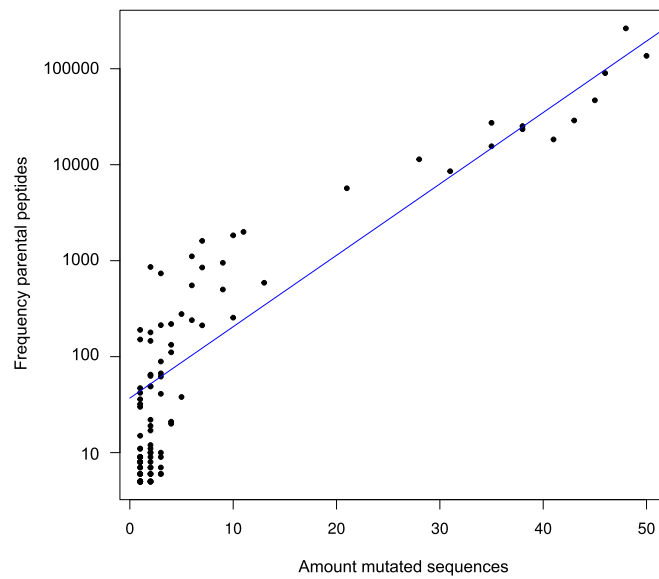

**Fig. 56.** Frequency of mutated peptides versus designed parental peptides after the fifth round of selection. The comparison between the amount of sequences with point mutations ( $x$  axis) to the frequency of their parental sequences ("Frequency parental peptides,"  $y$  axis, log-scale) illustrates that the more selected a wild-type peptide is, the more mutants of it will accumulate during the phage propagation.

**Table S1. Comprehensive list of selected targets for each domain with literature references when applicable**

| Protein       | Peptide  | Library A | Library B | Total   | Uniprot           | Source              | PMID     | Rank Pro-PD | Rank Tonikian |
|---------------|----------|-----------|-----------|---------|-------------------|---------------------|----------|-------------|---------------|
| Scribble PDZ1 | RFLETKL  | 67,514    | 45,351    | 112,865 | B7Z2Y1_HUMAN      |                     |          | 1           | 4             |
| Scribble PDZ1 | AWDETNL  | 3,009     | 1,552     | 4,561   | ARHG7_HUMAN       | Audebert et al. (1) | 15182672 | 2           | 25            |
| Scribble PDZ1 | HMFETFL  | 286       | 5         | 291     | ARHG8_HUMAN       |                     |          | 3           | 15            |
| Scribble PDZ1 | TSRETDL  | 9         | 1         | 10      | KCNA5_HUMAN       | Zhang et al. (2)    | 16737968 | 4           | 186           |
| Scribble PDZ1 | RGEESTM  | 0         | 8         | 8       | VWCE_HUMAN        |                     |          | 5           | 12,927        |
| Scribble PDZ1 | IREHLW   | 7         | 0         | 7       | DNML1_HUMAN       |                     |          | 6           | 41,469        |
| Scribble PDZ2 | GSPDSWV  | 0         | 618       | 618     | PKP4_HUMAN        |                     |          | 1           | 2,100         |
| Scribble PDZ2 | VQRHTWL  | 76        | 70        | 146     | NXPE2_HUMAN       |                     |          | 2           | 126           |
| Scribble PDZ2 | RFLETKL  | 35        | 41        | 76      | B7Z2Y1_HUMAN      |                     |          | 3           | 3             |
| Scribble PDZ2 | AWDETNL  | 29        | 29        | 58      | ARHG7_HUMAN       | Audebert et al. (1) | 15182672 | 4           | 46            |
| Scribble PDZ2 | ASPDWV   | 6         | 32        | 38      | CTND2_HUMAN       |                     |          | 5           | 523           |
| Scribble PDZ2 | PYEQVQL  | 20        | 1         | 21      | ZSWM1_HUMAN       |                     |          | 6           | 14,689        |
| Scribble PDZ3 | VQRHTWL  | 83,844    | 17,638    | 101,482 | NXPE2_HUMAN       |                     |          | 1           | 55            |
| Scribble PDZ3 | AWDETNL  | 30,601    | 27,096    | 57,697  | ARHG7_HUMAN       | Audebert et al. (1) | 15182672 | 2           | 322           |
| Scribble PDZ3 | RFLETKL  | 12,281    | 17,719    | 30,000  | B7Z2Y1_HUMAN      |                     |          | 3           | 13            |
| Scribble PDZ3 | HMFETFL  | 2         | 7,318     | 7,320   | ATD2B_HUMAN       |                     |          | 4           | 14            |
| Scribble PDZ3 | NLRETDI  | 784       | 494       | 1,278   | ADA1D_HUMAN       |                     |          | 5           | 112           |
| Scribble PDZ3 | IREHLW   | 1         | 1,193     | 1,194   | DNM1L_HUMAN       |                     |          | 6           | 36,666        |
| Scribble PDZ3 | VSKETPL  | 782       | 359       | 1,141   | MK12_HUMAN        |                     |          | 7           | 179           |
| Scribble PDZ3 | PGKETQL  | 775       | 0         | 775     | SO1C1_HUMAN       |                     |          | 8           | 77            |
| Scribble PDZ3 | DRKETS   | 302       | 0         | 302     | RBP1_HUMAN        |                     |          | 9           | 99            |
| Scribble PDZ3 | FLRETS   | 1         | 252       | 253     | GCYA2_HUMAN       |                     |          | 10          | 1             |
| Scribble PDZ3 | RLWETS   | 1         | 248       | 249     | ADA22_HUMAN       |                     |          | 11          | 1,230         |
| Scribble PDZ3 | PTRETS   | 91        | 145       | 236     | KCNB2_HUMAN       |                     |          | 12          | 342           |
| Scribble PDZ3 | TIFETAL  | 203       | 12        | 215     | MRP4_HUMAN        |                     |          | 13          | 2             |
| Scribble PDZ3 | AWFDLTDL | 174       | 0         | 174     | CTNB1_HUMAN       | Xhang et al. (2)    | 16737968 | 14          | 228           |
| Scribble PDZ3 | GEKETHL  | 94        | 76        | 170     | S6A12_HUMAN       | Gfeller et al. (3)  | 21525870 | 15          | 23            |
| Scribble PDZ3 | YRRESEI  | 100       | 11        | 111     | IRK12_HUMAN       |                     |          | 16          | 3,906         |
| Scribble PDZ3 | TSRETDL  | 7         | 86        | 93      | KCNA5_HUMAN       | Xhang et al. (2)    | 16737968 | 17          | 5             |
| Scribble PDZ3 | ASFWETS  | 87        | 0         | 87      | MET_HUMAN         |                     |          | 18          | 30,860        |
| Scribble PDZ3 | LYGESDL  | 55        | 0         | 55      | ACTN1,2,3,4_HUMAN | Xhang et al. (2)    | 16737968 | 19          | 877           |
| Scribble PDZ3 | YRRESAI  | 2         | 39        | 41      | IRK4_HUMAN        |                     |          | 20          | 42            |
| Scribble PDZ3 | PGKTTAL  | 0         | 39        | 39      | DLK2_HUMAN        |                     |          | 21          | 268           |
| Scribble PDZ3 | YKKETPL  | 30        | 1         | 31      | ANR50_HUMAN       |                     |          | 22          | 104           |
| Scribble PDZ3 | DLWETAL  | 3         | 26        | 29      | S15A5_HUMAN       |                     |          | 23          | 21            |
| Scribble PDZ3 | GSRETGL  | 0         | 26        | 26      | F189B_HUMAN       |                     |          | 24          | 58            |
| Scribble PDZ3 | GDLFSTD  | 0         | 21        | 21      | RPR1B_HUMAN       |                     |          | 25          | 9,794         |
| Scribble PDZ3 | PHSETAL  | 1         | 17        | 18      | TMIG1_HUMAN       |                     |          | 26          | 472           |
| Scribble PDZ3 | AGPETKL  | 0         | 15        | 15      | STAR8_HUMAN       |                     |          | 27          | 2,136         |
| Scribble PDZ3 | THWRETI  | 0         | 14        | 14      | ZN563_HUMAN       |                     |          | 28          | 48,049        |
| Scribble PDZ3 | KGTETTL  | 0         | 10        | 10      | S4A4_HUMAN        |                     |          | 29          | 352           |
| Scribble PDZ3 | MYKSSDI  | 0         | 8         | 8       | NR2E1_HUMAN       |                     |          | 30          | 577           |
| Scribble PDZ3 | SWPGTFL  | 0         | 7         | 7       | LNX1_HUMAN        |                     |          | 31          | 356           |
| Densin-180    | GSPDSWV  | Failed    | 5,450     | 5,450   | PKP4_HUMAN        |                     |          | 1           | 170           |
| Densin-180    | ASPDWV   | Failed    | 2,794     | 2,794   | CTND2_HUMAN       | Izawa et al. (4)    | 11729199 | 2           | 35            |
| Erbin         | ASPDWV   | 64,274    | 71,946    | 136,220 | CTND2_HUMAN       | Laura et al. (5)    | 11821434 | 1           | 2             |
| Erbin         | GSPDSWV  | 0         | 17,680    | 17,680  | PKP4_HUMAN        | Izawa et al. (6)    | 12047349 | 2           | 3             |
| Erbin         | QPVDSWV  | 1,747     | 88        | 1,835   | ARVC_HUMAN        | Laura et al. (5)    | 11821434 | 3           | 4             |
| Erbin         | YYDYTDV  | 114       | 2         | 116     | GPR87_HUMAN       |                     |          | 4           | 1,357         |
| Erbin         | VQRHTWL  | 21        | 1         | 22      | NXPE2_HUMAN       |                     |          | 5           | 44            |
| Erbin         | PEEESWV  | 14        | 5         | 19      | GA2L2_HUMAN       |                     |          | 6           | 46            |
| DLG1 PDZ1     | RFLETKL  | 569       | 77        | 646     | B7Z2Y1_HUMAN      |                     |          | 1           | 721           |
| DLG1 PDZ1     | QMSVHNV  | 131       | 0         | 131     | TBX15_HUMAN       |                     |          | 2           | 1,230         |
| DLG1 PDZ2     | LRKETRV  | 58,320    | 29,164    | 87,484  | CLTR2_HUMAN       | Gfeller et al. (3)  | 21525870 | 1           | 24            |
| DLG1 PDZ2     | RSISTDV  | 14,224    | 24,273    | 38,497  | F163B_HUMAN       |                     |          | 2           | 2             |
| DLG1 PDZ2     | KRKETLV  | 21,909    | 11,998    | 33,907  | ARHG8_HUMAN       | Carr et al. (7)     | 19586902 | 3           | 3             |
| DLG1 PDZ2     | SARSTDV  | 4,643     | 16,686    | 21,329  | ANO9_HUMAN        | Gfeller et al. (3)  | 21525870 | 4           | 1             |
| DLG1 PDZ2     | AGRETTV  | 719       | 10,401    | 11,120  | KIF1B_HUMAN       | Mok et al. (8)      | 12097473 | 5           | 13            |
| DLG1 PDZ2     | NSKETVV  | 421       | 279       | 700     | MARH3_HUMAN       |                     |          | 6           | 5             |
| DLG1 PDZ2     | WKHETTV  | 483       | 90        | 573     | GP125_HUMAN       | Yamamoto et al. (9) | 15021905 | 7           | 41            |
| DLG1 PDZ2     | RAISTDV  | 185       | 155       | 340     | F163A_HUMAN       |                     |          | 8           | 18            |
| DLG1 PDZ2     | WKNETTV  | 255       | 35        | 290     | GP123_HUMAN       |                     |          | 9           | 218           |
| DLG1 PDZ2     | GTKSTTV  | 0         | 269       | 269     | DCNL1_HUMAN       |                     |          | 10          | 43            |

**Table S1. Cont.**

| Protein   | Peptide  | Library A | Library B | Total   | Uniprot     | Source                  | PMID     | Rank ProP-PD | Rank Tonikian |
|-----------|----------|-----------|-----------|---------|-------------|-------------------------|----------|--------------|---------------|
| DLG1 PDZ2 | RHRNTVV  | 42        | 147       | 189     | ERBB4_HUMAN | Huang et al. (10)       | 12175853 | 11           | 12            |
| DLG1 PDZ2 | MTKDTLV  | 60        | 18        | 78      | PL8L1_HUMAN |                         |          | 12           | 42            |
| DLG1 PDZ2 | QRTHTRV  | 73        | 5         | 78      | ZSC30_HUMAN |                         |          | 13           | 372           |
| DLG1 PDZ2 | SGISTIV  | 27        | 33        | 60      | IQEC1_HUMAN |                         |          | 14           | 29            |
| DLG1 PDZ2 | GSPDSWV  | 0         | 54        | 54      | PKP4_HUMAN  | Izawa et al. (4)        | 12047349 | 15           | 314           |
| DLG1 PDZ2 | WKSETTV  | 42        | 5         | 47      | GP124_HUMAN | Yamamoto et al. (9)     | 15021905 | 16           | 148           |
| DLG1 PDZ2 | GNRESVV  | 0         | 45        | 45      | RNF12_HUMAN |                         |          | 17           | 17            |
| DLG1 PDZ2 | GGRQSVV  | 0         | 38        | 38      | PRR5_HUMAN  |                         |          | 18           | 16            |
| DLG1 PDZ2 | SSIESDV  | 18        | 18        | 36      | NMDE2_HUMAN | Inanobe et al. (11)     | 11997254 | 19           | 28            |
| DLG1 PDZ2 | RDRESIV  | 19        | 16        | 35      | SCN5A_HUMAN | Petitprez et al. (12)   | 21164104 | 20           | 19            |
| DLG1 PDZ2 | PGKETQL  | 2         | 29        | 31      | SO1C1_HUMAN |                         |          | 21           | 108           |
| DLG1 PDZ2 | KIKETTV  | 15        | 12        | 27      | FRPD4_HUMAN | Lee et al. (13)         | 19118189 | 22           | 38            |
| DLG1 PDZ2 | IKTETTV  | 12        | 12        | 24      | RASF6_HUMAN |                         |          | 23           | 270           |
| DLG1 PDZ2 | DKKITTV  | 13        | 9         | 22      | EXOC4_HUMAN | Bolis et al. (14)       | 19587293 | 24           | 451           |
| DLG1 PDZ2 | VQRHTWL  | 15        | 3         | 18      | NXPE2_HUMAN |                         |          | 25           | 33            |
| DLG1 PDZ2 | DRKETS I | 8         | 9         | 17      | RBP1_HUMAN  |                         |          | 26           | 70            |
| DLG1 PDZ2 | TSRETDL  | 13        | 0         | 13      | KCNA5_HUMAN | Mathur et al. (15)      | 16466689 | 27           | 4             |
| DLG1 PDZ2 | KAVETDV  | 5         | 5         | 10      | KCNA4_HUMAN | Kim et al. (16)         | 7477295  | 28           | 9             |
| DLG1 PDZ2 | YRRESEI  | 7         | 0         | 7       | IRK12_HUMAN | Leonoudakis et al. (17) | 14960569 | 29           | 267           |
| DLG1 PDZ2 | ASPDWV   | 1         | 6         | 7       | CTND2_HUMAN |                         |          | 30           | 429           |
| DLG1 PDZ3 | LRKETRV  | 146285    | 89,316    | 235,601 | CLTR2_HUMAN | Gfeller et al. (3)      | 21525870 | 1            | 2             |
| DLG1 PDZ3 | NYKQTSV  | 287       | 622       | 909     | CRIP1_HUMAN | Cai et al. (18)         | 12070168 | 2            | 1             |
| DLG1 PDZ3 | KRKETLV  | 18        | 4         | 22      | ARHG8_HUMAN | Carr (6)                | 19586902 | 3            | 5             |

Library A and Library B, the sequencing counts for a given peptide from the replicate selection; Peptide, the selected C-terminal peptides; Protein, the identity of the bait PDZ domain; Rank ProP-PD, the rank of a peptide based on the selection (1: sequence with the highest total sequencing counts); Rank Tonikian PWM, predicted rank of a selected peptide using position specific scoring matrices based on the data of Tonikian et al. (18) among all sequences in the designed human ProP-PD library Reference, reference to a supporting publication with Pubmed id in PMID; Total, total sequencing counts of a given peptide; Uniprot, the Uniprot entry corresponding to a selected peptide.

- Audebert S, et al. (2004) Mammalian Scribble forms a tight complex with the betaPIX exchange factor. *Curr Biol* 14(11):987–995.
- Zhang Y, et al. (2006) Convergent and divergent ligand specificity among PDZ domains of the LAP and zonula occludens (ZO) families. *J Biol Chem* 281(31):22299–22311.
- Gfeller D, et al. (2011) The multiple-specificity landscape of modular peptide recognition domains. *Mol Syst Biol* 7:484.
- Izawa I, et al. (2002) Densin-180 interacts with delta-catenin/neural plakophilin-related armadillo repeat protein at synapses. *J Biol Chem* 277(7):5345–5350.
- Laura RP, et al. (2002) The Erbin PDZ domain binds with high affinity and specificity to the carboxyl termini of delta-catenin and ARVCF. *J Biol Chem* 277(15):12906–12914.
- Izawa I, et al. (2002) ERBIN associates with p0071, an armadillo protein, at cell-cell junctions of epithelial cells. *J Biol Chem* 277(15):12906–12914.
- Carr HS, et al. (2009) Interaction of the RhoA exchange factor Net1 with discs large homolog 1 protects it from proteasome-mediated degradation and potentiates Net1 activity. *J Biol Chem* 284(36):24269–24280.
- Yamamoto Y, et al. (2004) Direct binding of the human homologue of the Drosophila disc large tumor suppressor gene to seven-pass transmembrane proteins, tumor endothelial marker 5 (TEM5), and a novel TEM5-like protein. *Oncogene* 23(22):3889–3897.
- Huang YZ, et al. (2002) Compartmentalized NRG signaling and PDZ domain-containing proteins in synapse structure and function. *Int J Dev Neurosci* 20(3-5):173–185.
- Inanobe A, et al. (2002) Inward rectifier K<sup>+</sup> channel Kir2.3 is localized at the postsynaptic membrane of excitatory synapses. *Am J Physiol Cell Physiol* 282(6):C1396–1403.
- Petitprez S, et al. (2011) SAP97 and dystrophin macromolecular complexes determine two pools of cardiac sodium channels Nav1.5 in cardiomyocytes. *Circ Res* 108(3):294–304.
- Lee HW, et al. (2008) Preso, a novel PSD-95-interacting FERM and PDZ domain protein that regulates dendritic spine morphogenesis. *J Neurosci* 28(53):14546–14556.
- Bolis A, et al. (2009) Dlg1, Sec8, and Mtmr2 regulate membrane homeostasis in Schwann cell myelination. *J Neurosci* 29(27):8858–8870.
- Mathur R, et al. (2006) A specific N-terminal residue in Kv1.5 is required for upregulation of the channel by SAP97. *Biochem Biophys Res Commun* 342(1):1–8.
- Kim E, et al. (1995) Clustering of Shaker-type K<sup>+</sup> channels by interaction with a family of membrane-associated guanylate kinases. *Nature* 378(6552):85–88.
- Leonoudakis D, et al. (2004) A multiprotein trafficking complex composed of SAP97, CASK, Veli, and Mint1 is associated with inward rectifier Kir2 potassium channels. *J Biol Chem* 279(18):19051–19063.
- Tonikian R, et al. (2008) A specificity map for the PDZ domain family. *PLoS Biol* 6(9):e239.



**Table S2. Comprehensive list of identified viral targets stating interacting PDZ domains, peptide sequences, sequencing counts, and literature reference, when applicable**

| Protein       | Peptide   | Count A | Count B | Total   | Uniprot     | Name                                                     | Source (for the protein, not always the exact variant) | PMID     |
|---------------|-----------|---------|---------|---------|-------------|----------------------------------------------------------|--------------------------------------------------------|----------|
| Scribble PDZ1 | RRRETAL   | x       | 21,586  | 21,586  | VE6_HP33    | Human papillomavirus type 33 protein E6                  | Nakagawa and Huibregtse (1)                            | 11027293 |
| Scribble PDZ1 | TRRETQL   | x       | 175     | 175     | VE6_HP16    | Human papillomavirus type 16 protein E6                  | Nakagawa and Huibregtse (1)                            | 11027293 |
| Scribble PDZ1 | PDTDWLV   | x       | 62      | 62      | LRP2_HHV1F  | Human herpesvirus 1 latency-related protein 2            |                                                        |          |
| Scribble PDZ2 | HFRETEV   | 3,827   | 49,903  | 53,730  | TAX_HTL1F   | Human T-cell leukemia virus 1 protein Tax-1              | Arpin-André and Mesnard (2)                            | 17855372 |
| Scribble PDZ2 | HFHETEVEV | 26      | 474     | 500     | TAX_HTL1L   | Human T-cell leukemia virus 1 protein Tax-1              | Arpin-André and Mesnard (2)                            | 17855372 |
| Scribble PDZ3 | RRRETAL   | 118,682 | 69,771  | 188,453 | VE6_HP33    | Human papillomavirus type 33 protein E6                  | Nakagawa and Huibregtse (1)                            | 11027293 |
| Scribble PDZ3 | TRRETQL   | 28,733  | 29,867  | 58,600  | VE6_HP16    | Human papillomavirus type 16 protein E6                  | Nakagawa and Huibregtse (1)                            | 11027293 |
| Scribble PDZ3 | HFRETEV   | 110     | 589     | 699     | TAX_HTL1F   | Human T-cell leukemia virus 1 protein Tax-1              | Arpin-André (2)                                        | 17855372 |
| Scribble PDZ3 | TRRETEV   | 81      | 130     | 211     | VE6_HP35    | Human papillomavirus type 35 protein E6                  | Nakagawa and Huibregtse (1)                            | 11027293 |
| Scribble PDZ3 | TRRETQV   | 39      | 145     | 184     | VE6_HP39    | Human papillomavirus type 39 protein E6                  | Nakagawa and Huibregtse (1)                            | 11027293 |
| Scribble PDZ3 | AIFSTDI   | 1       | 81      | 82      | YVDA_VACCW  | Vaccinia virus uncharacterized 9.2 kDa protein           |                                                        |          |
| Scribble PDZ3 | SGGETRL   | 2       | 75      | 77      | VGLG_RABVV  | Rabies virus glycoprotein G                              |                                                        |          |
| Scribble PDZ3 | TGRSTTL   | 8       | 64      | 72      | VFUS_SHEVK  | Sheeppox virus putative fusion protein                   |                                                        |          |
| Scribble PDZ3 | IRRETQV   | 24      | 41      | 65      | VE6_HP70    | Human papillomavirus type 70, protein E6                 | Nakagawa and Huibregtse (1)                            | 11027293 |
| Scribble PDZ3 | RRRETQV   | 2       | 61      | 63      | VE6_HP45    | Human papillomavirus type 45, protein E6                 | Nakagawa and Huibregtse (1)                            | 11027293 |
| Scribble PDZ3 | HFHETEVEV | 6       | 39      | 45      | TAX_HTL1L   | Human T-cell leukemia virus 1 protein Tax-1              | Okajima et al. (3)                                     | 18661220 |
| Scribble PDZ3 | PFSSSDL   | 4       | 15      | 19      | GAG_MLVAB   | Abelson murine leukemia virus Gag polyprotein            |                                                        |          |
| Scribble PDZ3 | LNJETNL   | 1       | 13      | 14      | ENV_HTL3P   | Human T-cell leukemia virus 3 envelope glycoprotein gp63 |                                                        |          |
| Erbin         | FPPEDWV   | 7       | 3,235   | 3,242   | VEMP_BCHK4  | Bat coronavirus Envelope small membrane protein          |                                                        |          |
| Erbin         | YPPEDWV   | 5       | 699     | 704     | VEMP_BCHK5  | Bat coronavirus Envelope small membrane protein          |                                                        |          |
| Erbin         | RRRETAL   | 4       | 407     | 411     | VE6_HP33    | Human papillomavirus type 33 protein E6                  |                                                        |          |
| Erbin         | DKLDNWW   | 2       | 319     | 321     | VPU_HV1YB   | HIV type 1 group N protein Vpu                           |                                                        |          |
| Erbin         | IDQDNWW   | 4       | 220     | 224     | VPU_SIVEK   | Simina immunodeficiency virus protein Vpu                |                                                        |          |
| Erbin         | TRRETQL   | 0       | 168     | 168     | VE6_HP16    | Human papillomavirus type 16 protein E6                  |                                                        |          |
| Erbin         | ATCTFTL   | 2       | 106     | 108     | VP23_ELHVK  | Elephantid herpesvirus 1, triplex capsid protein U56     |                                                        |          |
| Erbin         | IRRETQV   | 6       | 92      | 98      | VE6_HP70    | Human papillomavirus type 70, protein E6                 |                                                        |          |
| Erbin         | ATHLINA   | 5       | 83      | 88      | 1102L_ASFWA | African swine fever virus protein MGF 110-2L             |                                                        |          |
| Erbin         | APSVLTV   | 2       | 80      | 82      | NS3D_BCHK5  | Bat coronavirus KHU5 nonstructural protein 3d            |                                                        |          |
| Erbin         | AVNFSTL   | 1       | 74      | 75      | OBP_HHV2H   | Human herpesvirus 2 replication origin-binding protein   |                                                        |          |
| Erbin         | HFRETEV   | 0       | 74      | 74      | TAX_HTL1F   | Human T-cell leukemia virus 1 protein Tax-1              | Song et al. (4)                                        | 19472191 |
| DLG1 PDZ1     | IRRETQV   | 283     | 539     | 822     | VE6_HP70    | Human papillomavirus type 70, protein E6                 | Gardiol et al. (5)                                     | 10523825 |
| DLG1 PDZ1     | TRRETQV   | 406     | 132     | 538     | VE6_HP39    | Human papillomavirus type 39 protein E6                  | Gardiol et al. (5)                                     | 10523825 |

Table S2. Cont.

| Protein   | Peptide | Count A | Count B | Total   | Uniprot     | Name                                                 | Source (for the protein, not always the exact variant) | PMID     |
|-----------|---------|---------|---------|---------|-------------|------------------------------------------------------|--------------------------------------------------------|----------|
| DLG1 PDZ2 | IRRETQV | 102,877 | 71,200  | 174,077 | VE6_HP70    | Human papillomavirus type 70, protein E6             | Gardiol et al. (5)                                     | 10523825 |
| DLG1 PDZ2 | TRRETQV | 17,861  | 24,016  | 41,877  | VE6_HP39    | Human papillomavirus type 39 protein E6              | Gardiol et al. (5)                                     | 10523825 |
| DLG1 PDZ2 | TRRETEV | 4,089   | 4,716   | 8,805   | VE6_HP35    | Human papillomavirus type 35 protein E6              | Gardiol et al. (5)                                     | 10523825 |
| DLG1 PDZ2 | TGRSTEV | 1,223   | 6,115   | 7,338   | VU47_HHV6U  | Human herpesvirus 6A glycoprotein U47                | Blot et al. (6)                                        | 15286176 |
| DLG1 PDZ2 | RRRETQV | 2,679   | 4,196   | 6,875   | VE6_HP18/45 | Human papillomavirus type 18/45 protein E6           | Gardiol et al. (5)                                     | 10523825 |
| DLG1 PDZ2 | RGIESEV | 329     | 1,321   | 1,650   | NS1_I63A1   | Influenza A virus (Avian) nonstructural protein 1    | Liu et al. (7)                                         | 20702615 |
| DLG1 PDZ2 | RRRETAL | 382     | 706     | 1,088   | VE6_HP33    | Human papillomavirus type 33 protein E6              | Gardiol et al. (5)                                     | 10523825 |
| DLG1 PDZ2 | HFRETEV | 100     | 534     | 634     | TAX_HTL1F   | Human T-cell leukemia virus 1 protein Tax-1          | Lee et al. (8)                                         | 9192623  |
| DLG1 PDZ2 | TRRETQL | 175     | 359     | 534     | VE6_HP16    | Human papillomavirus type 16 protein E6              | Gardiol et al. (5)                                     | 10523825 |
| DLG1 PDZ2 | TRQETQV | 22      | 323     | 345     | VE6_HP180   | Human papillomavirus type ME180 protein E6           | Gardiol et al. (5)                                     | 10523825 |
| DLG1 PDZ2 | IRQETQV | 46      | 293     | 339     | VE6_HP68    | Human papillomavirus type 68 protein E6              | Gardiol et al. (5)                                     | 10523825 |
| DLG1 PDZ2 | RHRETYV | 25      | 133     | 158     | US32_HCMVA  | Human cytomegalovirus, uncharacterized protein HHRF7 |                                                        |          |
| DLG1 PDZ2 | PRTETQV | 9       | 139     | 148     | VE6_HP31    | Human papillomavirus type 31 protein E6              | Gardiol et al. (5)                                     | 10523825 |
| DLG1 PDZ2 | RQTETQV | 8       | 101     | 109     | VE6_HP26    | Human papillomavirus type 26 protein E6              | Gardiol et al. (5)                                     | 10523825 |
| DLG1 PDZ2 | QRNETQV | 24      | 72      | 96      | VE6_HP51    | Human papillomavirus type 51 protein E6              | Gardiol et al. (5)                                     | 10523825 |
| DLG1 PDZ2 | RRIESEV | 3       | 22      | 25      | NS1_I49A1   | Influenza A virus (Avian) nonstructural protein 1    | Liu et al. (7)                                         | 20702615 |
| DLG1 PDZ2 | RRVESEV | 3       | 18      | 21      | NS1_I82A8   | Influenza A virus (Avian) nonstructural protein 1    | Liu et al. (7)                                         | 20702615 |
| DLG1 PDZ2 | RRRQTQV | 0       | 11      | 11      | VE6_HP58    | Human papillomavirus type 58 protein E6              | Gardiol et al. (5)                                     | 10523825 |
| DLG1 PDZ2 | TGRSTTL | 1       | 9       | 10      | VFUS_SHEVK  | Sheeppox virus putative fusion protein               |                                                        |          |
| DLG1 PDZ3 | IRRETQV | 61,437  | 31,152  | 92,589  | VE6_HP70    | Human papillomavirus type 70, protein E6             | Gardiol et al. (5)                                     | 10523825 |
| DLG1 PDZ3 | TRRETQV | 19,459  | 10,283  | 29,742  | VE6_HP39    | Human papillomavirus type 39 protein E6              | Gardiol et al. (5)                                     | 10523825 |
| DLG1 PDZ3 | RRRETQV | 2,336   | 8,525   | 10,861  | VE6_HP45    | Human papillomavirus type 18/45 protein E6           | Gardiol et al. (5)                                     | 10523825 |
| DLG1 PDZ3 | RRRETAL | 1,213   | 1,297   | 2,510   | VE6_HP33    | Human papillomavirus type 33 protein E6              | Gardiol et al. (5)                                     | 10523825 |
| DLG1 PDZ3 | TRRETEV | 90      | 227     | 317     | VE6_HP35    | Human papillomavirus type 35 protein E6              | Gardiol et al. (5)                                     | 10523825 |
| DLG1 PDZ3 | RHRETYV | 26      | 49      | 75      | US32_HCMVA  | Human cytomegalovirus, uncharacterized protein HHRF7 |                                                        |          |

Column labels are as in Table S1, plus a "Name" describing the protein and virus.

- Nakagawa S, Huijbregt JM (2000) Human scribble (Vartul) is targeted for ubiquitin-mediated degradation by the high-risk papillomavirus E6 proteins and the E6AP ubiquitin-protein ligase. *Mol Cell Biol* 20(21):8244–8253.
- Arpin-André C, Mesnard JM (2007) The PDZ domain-binding motif of the human T cell leukemia virus type 1 tax protein induces mislocalization of the tumor suppressor hScrib in T cells. *J Biol Chem* 282(45):33132–33141.
- Okajima M, et al. (2008) Human T-cell leukemia virus type 1 Tax induces an aberrant clustering of the tumor suppressor Scribble through the PDZ domain-binding motif dependent and independent interaction. *Virus Genes* 37(2):231–240.
- Song C, et al. (2009) Tax1 enhances cancer cell proliferation via Ras-Raf-MEK-ERK signaling pathway. *IUBMB Life* 61(6):685–692.
- Gardiol D, et al. (1999) Oncogenic human papillomavirus E6 proteins target the discs large tumour suppressor for proteasome-mediated degradation. *Oncogene* 18(40):5487–5496.
- Blot V, et al. (2004) Human Dlg protein binds to the envelope glycoproteins of human T-cell leukemia virus type 1 and regulates envelope mediated cell-cell fusion in T lymphocytes. *J Cell Sci* 117(Pt 17):3983–3993.
- Liu H, et al. (2010) The E6E5V PDZ-binding motif of the avian influenza A virus NS1 protein protects infected cells from apoptosis by directly targeting Scribble. *J Virol* 84(21):11164–11174.
- Lee SS, Weiss RS, Javier RT (1997) Binding of human virus oncoproteins to hDlg/SAP97, a mammalian homolog of the *Drosophila* discs large tumor suppressor protein. *Proc Natl Acad Sci USA* 94(13):6670–6675.

**Table S3. Selected peptides of low interest to this study**

| PDZ domain                                                  | Peptide | Protein                                | # Library A | # Library B | Total count |
|-------------------------------------------------------------|---------|----------------------------------------|-------------|-------------|-------------|
| Additional target peptides from the proteolytic TopFind set |         |                                        |             |             |             |
| Scribble PDZ1                                               | DRDYMGW | CCKN_HUMAN, CLEAVAGE-8141              | 343         | 0           | 343         |
| Scribble PDZ2                                               | GFYESDV | A2MG_HUMAN CLEAVAGE-593                | 1           | 328         | 329         |
| Scribble PDZ3                                               | GFYESDV | A2MG_HUMAN CLEAVAGE-593                | 0           | 242         | 242         |
| Scribble PDZ3                                               | WTTSTD  | AMPH_HUMAN INFERRED FROM CLEAVAGE-4706 | 1,823       | 62          | 1,885       |
| Additional target peptides from the ENSEMBL-only set        |         |                                        |             |             |             |
| Scribble PDZ1                                               | KTYETDL | ENSP00000447314                        | 1,326       | 56          | 1,382       |
| Scribble PDZ3                                               | KTYETDL | ENSP00000447314                        | 2,224       | 12,398      | 14,622      |
| Scribble PDZ3                                               | LLRETS  | ENSP00000420911                        | 97          | 0           | 97          |
| Scribble PDZ3                                               | VSRETKL | ENSP00000415771                        | 0           | 85          | 85          |
| Scribble PDZ3                                               | GIRESKL | ENSP00000399301                        | 0           | 79          | 79          |
| Scribble PDZ3                                               | GVRKETA | ENSP00000451805                        | 0           | 20          | 20          |
| Scribble PDZ3                                               | FSEGTDL | ENSP00000440057                        | 0           | 10          | 10          |
| Scribble PDZ3                                               | AGKTTIL | ENSP00000450315                        | 0           | 8           | 8           |
| Erbin                                                       | QENDWWV | ENSP00000398110                        | 28,359      | 1,117       | 29,476      |
| Erbin                                                       | QHHWESW | ENSP00000270281                        | 0           | 40          | 40          |
| DLG1 PDZ2                                                   | FPKETQV | ENSP00000442101                        | 0           | 2,275       | 2,275       |
| DLG1 PDZ2                                                   | SGTAYLL | ENSP00000449745                        | 8           | 7           | 1           |

The peptides correspond to protein C termini either only supported by an experiment in TopFind (resulting from proteolytic cleavage or COFRADIC-based complementary positional proteomics experiments) or only found in ENSEMBL. PDZ domain, the identity of the bait PDZ domain; Peptide, the selected C-terminal peptides; Protein, the identifier corresponding to a selected peptide and the cleavage site when applicable; # Library A and # Library B, the sequencing counts for a given peptide from the replicate selection.

### Other Supporting Information Files

[Dataset S1 \(XLSX\)](#)

[Dataset S2 \(XLSX\)](#)
